# Supplementary material for: Life-Cycle and Genome of OtV5, a Large DNA Virus of the Pelagic Marine Unicellular Green Alga Ostreococcus tauri
Source: PLoS One. 2008 May 28;3(5):e2250. doi: 10.1371/journal.pone.0002250 (PMC2386258; doi:10.1371/journal.pone.0002250)
Supplement: Table S1 — Presence of Pfam motifs in putative OtV5 proteins. Pfam motifs were detected using the pfam_scan.pl script with default values. Motifs corresponding to the same CDS product are grouped and coloured alternatively red and blue. Amino acid sequences with no detectable motif are not presented. Columns show respectively the OtV5 gene name, start and end coordinates on the amino acid sequence, the Pfam accession number (linked to the corresponding Pfam web page), indication of complete (ls) or partial (fs) motifs, Bit value, e-value, Pfam ID and whether the motif is nested in another motif. (0.19 MB XLS) [file pone.0002250.s001.xls]

## Sheet: OtV5_Pfam
Sequence identifier	Seq. start	Seq. stop	Pfam identifier	HMM start	HMM stop	ls/fs	Bit value	E value	Pfam identifier	Whether nested
OTV5_002R	8	29	PF07523	52	70	fs	8.7	0.16	Big_3	no
OTV5_002R	108	137	PF01635	198	230	fs	3.9	0.43	Corona_M	no
OTV5_002R	291	305	PF09589	272	286	fs	8.1	0.0099	HrpA_pilin	no
OTV5_005R	1	23	PF09588	14	40	fs	5.8	0.28	YqaJ	no
OTV5_005R	19	31	PF00876	400	412	fs	5.4	0.24	Innexin	no
OTV5_005R	23	183	PF05701	1	551	ls	-126.8	0.57	DUF827	no
OTV5_005R	42	185	PF03304	1	188	ls	-36.6	0.79	Mlp	no
OTV5_005R	218	235	PF06850	186	203	fs	5.0	0.8	PHB_depo_C	no
OTV5_006R	39	217	PF00929	1	186	ls	52.0	2.1e-12	Exonuc_X-T	no
OTV5_011F	6	241	PF01370	1	286	ls	275.8	8.9e-80	Epimerase	no
OTV5_012R	77	101	PF00182	1	26	fs	5.3	0.21	Glyco_hydro_19	no
OTV5_012R	172	225	PF00534	89	146	fs	20.7	3.2e-05	Glycos_transf_1	no
OTV5_013R	25	154	PF06480	1	172	ls	26.8	1.4e-06	FtsH_ext	no
OTV5_013R	178	201	PF06414	28	51	fs	5.7	0.49	Zeta_toxin	no
OTV5_013R	180	367	PF00004	1	216	fs	293.4	7.5e-89	AAA	no
OTV5_013R	182	294	PF08477	1	140	ls	-17.9	0.47	Miro	yes
OTV5_013R	396	569	PF01434	25	216	fs	209.4	1.5e-60	Peptidase_M41	no
OTV5_015R	131	145	PF00599	64	78	fs	3.9	0.46	Flu_M2	no
OTV5_017F	95	113	PF06588	187	205	fs	4.6	0.93	Muskelin_N	no
OTV5_017F	102	112	PF02945	109	121	fs	9.1	0.17	Endonuclease_7	yes
OTV5_017F	120	184	PF03457	1	71	ls	15.8	0.0084	HA	no
OTV5_017F	170	188	PF01985	1	19	fs	6.5	0.17	CRS1_YhbY	no
OTV5_018R	41	74	PF01616	191	234	fs	3.6	0.89	Orbi_NS3	no
OTV5_018R	129	222	PF01101	1	119	ls	-20.5	0.53	HMG14_17	no
OTV5_020R	132	148	PF09234	255	271	fs	2.3	0.94	DUF1963	no
OTV5_020R	153	174	PF01343	137	159	fs	7.4	0.12	Peptidase_S49	no
OTV5_020R	181	356	PF00534	1	195	ls	-34.4	0.19	Glycos_transf_1	no
OTV5_020R	367	389	PF06096	44	67	fs	6.8	0.01	Baculo_8kDa	no
OTV5_021R	3	41	PF00097	1	50	ls	32.7	1.4e-06	zf-C3HC4	no
OTV5_021R	25	34	PF02819	1	10	fs	6.5	0.65	Toxin_9	yes
OTV5_021R	33	39	PF01422	1	9	fs	4.0	0.89	zf-NF-X1	yes
OTV5_021R	37	46	PF07503	1	10	fs	4.5	0.89	zf-HYPF	no
OTV5_023F	32	51	PF08235	35	54	fs	7.4	0.062	LNS2	no
OTV5_023F	41	56	PF07110	1	17	fs	6.0	0.2	EthD	no
OTV5_024R	1	117	PF07500	1	133	ls	-14.0	0.0085	TFIIS_M	no
OTV5_024R	128	166	PF01096	1	39	ls	82.9	1.1e-21	TFIIS_C	no
OTV5_028R	108	146	PF00310	341	385	fs	29.1	4.2e-09	GATase_2	no
OTV5_028R	193	417	PF00733	1	327	ls	294.5	2.1e-85	Asn_synthase	no
OTV5_028R	485	494	PF04807	24	33	fs	5.8	0.9	Gemini_AC4_5	no
OTV5_029R	73	95	PF05362	1	23	fs	7.2	0.086	Lon_C	no
OTV5_030F	1	201	PF02562	1	207	ls	205.0	1.9e-58	PhoH	no
OTV5_030F	18	36	PF09439	1	19	fs	4.3	0.53	SRPRB	yes
OTV5_030F	20	40	PF05729	1	20	fs	12.1	0.0027	NACHT	yes
OTV5_031F	72	167	PF00535	81	149	fs	3.9	0.75	Glycos_transf_2	no
OTV5_032R	26	46	PF04522	182	205	fs	4.8	0.34	DUF585	no
OTV5_032R	40	56	PF08757	486	503	fs	4.4	0.46	CotH	no
OTV5_033R	3	240	PF05637	1	312	ls	-1.4	3.8e-07	Glyco_transf_34	no
OTV5_033R	27	246	PF03314	1	238	ls	-130.3	0.012	DUF273	no
OTV5_034R	261	282	PF04405	1	18	fs	7.6	0.15	ScdA_N	no
OTV5_035F	37	100	PF00535	1	66	fs	3.7	0.86	Glycos_transf_2	no
OTV5_037F	1	177	PF02776	1	181	fs	92.2	3.4e-26	TPP_enzyme_N	no
OTV5_037F	183	303	PF00205	9	145	fs	84.8	3.1e-23	TPP_enzyme_M	no
OTV5_037F	363	506	PF02775	1	212	fs	103.0	9.2e-32	TPP_enzyme_C	no
OTV5_039F	31	302	PF01761	1	339	ls	130.9	3.8e-36	DHQ_synthase	no
OTV5_039F	56	74	PF03726	18	37	fs	2.5	0.87	PNPase	yes
OTV5_039F	270	277	PF08588	51	58	fs	6.0	0.24	DUF1769	yes
OTV5_040F	2	204	PF01370	1	286	ls	-51.9	0.0027	Epimerase	no
OTV5_041R	3	97	PF01370	1	143	fs	37.2	4.2e-09	Epimerase	no
OTV5_041R	55	72	PF00766	35	52	fs	6.6	0.27	ETF_alpha	yes
OTV5_042F	1	15	PF05894	1	15	fs	3.6	0.65	Podovirus_Gp16	no
OTV5_042F	13	371	PF01041	1	407	ls	280.4	3.5e-81	DegT_DnrJ_EryC1	no
OTV5_042F	277	286	PF04701	151	160	fs	5.8	0.094	Pox_D2	yes
OTV5_043F	4	243	PF01370	1	286	ls	220.3	4.6e-63	Epimerase	no
OTV5_047F	1	125	PF06897	1	170	ls	-113.2	0.8	DUF1269	no
OTV5_047F	23	43	PF03354	510	530	fs	3.5	0.28	Terminase_1	yes
OTV5_047F	74	151	PF07843	1	114	ls	-51.4	0.83	DUF1634	no
OTV5_047F	87	118	PF00115	1	32	fs	2.9	0.74	COX1	yes
OTV5_050F	62	73	PF04638	796	807	fs	5.8	0.18	Pox_O1	no
OTV5_052R	78	92	PF04309	1	15	fs	5.4	0.42	G3P_antiterm	no
OTV5_053R	5	12	PF07736	111	118	fs	4.4	0.63	CM_1	no
OTV5_054R	44	52	PF01433	431	439	fs	0.2	0.88	Peptidase_M1	no
OTV5_054R	63	79	PF01607	42	58	fs	6.2	0.25	CBM_14	no
OTV5_054R	129	207	PF07172	1	134	ls	-38.5	0.73	GRP	no
OTV5_055R	8	28	PF01416	101	125	fs	4.2	0.65	PseudoU_synth_1	no
OTV5_055R	155	171	PF02352	107	128	fs	4.6	0.43	Decorin_bind	no
OTV5_058F	1	162	PF04848	1	163	ls	-16.4	1.8e-05	Pox_A22	no
OTV5_058F	2	165	PF09159	1	392	ls	-76.2	0.0083	Ydc2-catalyt	no
OTV5_059F	6	214	PF02511	1	247	ls	270.9	2.7e-78	Thy1	no
OTV5_060R	17	31	PF06229	1	15	fs	1.4	0.56	FRG1	no
OTV5_062R	96	209	PF03109	1	126	ls	115.1	2.1e-31	ABC1	no
OTV5_062R	255	282	PF01636	175	206	fs	10.1	0.012	APH	no
OTV5_063F	48	93	PF02417	132	177	fs	4.4	0.95	Chromate_transp	no
OTV5_063F	75	94	PF09241	1	20	fs	4.6	0.51	Herp-Cyclin	no
OTV5_065F	2	39	PF01266	1	37	fs	16.7	0.00016	DAO	no
OTV5_065F	157	337	PF09270	1	205	ls	-53.1	0.35	Beta-trefoil	no
OTV5_065F	402	431	PF04290	135	164	fs	5.6	0.29	DctQ	no
OTV5_066F	45	61	PF06680	104	120	fs	3.9	0.6	DUF1181	no
OTV5_066F	68	83	PF08379	67	82	fs	7.0	0.27	Bact_transglu_N	no
OTV5_067F	71	85	PF08312	1	15	fs	7.9	0.17	cwf21	no
OTV5_067F	119	229	PF04851	52	238	fs	35.3	2.1e-09	ResIII	no
OTV5_067F	175	196	PF07723	1	22	fs	4.9	0.7	LRR_2	yes
OTV5_067F	323	343	PF00451	1	20	fs	4.1	0.56	Toxin_2	no
OTV5_067F	325	393	PF00271	1	76	ls	-0.5	0.046	Helicase_C	no
OTV5_068F	1	373	PF04451	1	706	ls	54.5	6.2e-14	Capsid_Iridovir	no
OTV5_068F	154	169	PF05031	118	133	fs	5.6	0.57	NEAT	yes
OTV5_069F	91	171	PF00942	1	92	ls	-20.6	0.28	CBM_3	no
OTV5_071F	243	256	PF00358	120	133	fs	5.6	0.36	PTS_EIIA_1	no
OTV5_073R	13	32	PF06955	1	31	fs	4.8	0.17	XET_C	no
OTV5_074F	4	40	PF02433	200	236	fs	3.2	0.73	FixO	no
OTV5_074F	14	30	PF00950	251	267	fs	5.9	0.26	ABC-3	yes
OTV5_074F	14	36	PF05806	1	23	fs	-0.5	0.27	Noggin	yes
OTV5_075F	6	25	PF01376	1	20	fs	6.0	0.17	Enterotoxin_b	no
OTV5_076F	1	340	PF04451	1	706	ls	78.5	2.2e-20	Capsid_Iridovir	no
OTV5_076F	208	230	PF04104	302	319	fs	1.6	0.92	DNA_primase_lrg	yes
OTV5_076F	254	266	PF07565	1	13	fs	4.3	0.35	Band_3_cyto	yes
OTV5_077F	274	301	PF09643	119	146	fs	1.3	3.4	YopX	no
OTV5_077F	298	320	PF01479	26	48	fs	2.4	11	S4	no
OTV5_077F	346	368	PF01479	26	48	fs	2.4	11	S4	no
OTV5_077F	370	397	PF09643	119	146	fs	3.1	0.89	YopX	no
OTV5_077F	372	492	PF04519	1	116	ls	1.7	0.004	DUF583	no
OTV5_077F	409	478	PF05594	1	75	fs	1.6	8.7	Fil_haemagg	yes
OTV5_077F	442	464	PF01479	26	48	fs	2.4	11	S4	yes
OTV5_077F	769	872	PF05594	1	75	fs	2.0	7	Fil_haemagg	no
OTV5_077F	861	962	PF03769	1	123	ls	-25.4	0.25	Attacin_C	no
OTV5_077F	872	897	PF07581	1	38	fs	6.2	0.48	Glug	yes
OTV5_077F	873	904	PF05594	44	75	fs	1.9	7.2	Fil_haemagg	yes
OTV5_079F	193	212	PF03212	1	25	fs	7.0	0.32	Pertactin	no
OTV5_080F	4	140	PF09411	1	151	ls	-33.0	0.27	PagL	no
OTV5_080F	42	59	PF05658	11	28	fs	1.6	25	Hep_Hag	yes
OTV5_080F	62	91	PF05658	1	28	ls	4.1	5.8	Hep_Hag	yes
OTV5_080F	94	123	PF05658	1	28	ls	4.2	5.7	Hep_Hag	yes
OTV5_080F	158	187	PF05658	1	28	ls	2.7	8.2	Hep_Hag	no
OTV5_080F	190	219	PF05658	1	28	ls	6.2	3.5	Hep_Hag	no
OTV5_080F	224	251	PF05658	3	28	fs	0.1	67	Hep_Hag	no
OTV5_080F	254	283	PF05658	1	28	ls	7.0	2.9	Hep_Hag	no
OTV5_080F	288	315	PF05658	3	28	fs	1.3	31	Hep_Hag	no
OTV5_080F	320	347	PF05658	1	28	ls	7.7	2.4	Hep_Hag	no
OTV5_080F	350	379	PF05658	1	28	ls	0.5	14	Hep_Hag	no
OTV5_080F	384	411	PF05658	1	28	ls	0.6	14	Hep_Hag	no
OTV5_080F	446	512	PF08017	311	377	fs	3.7	0.33	Fibrinogen_BP	no
OTV5_080F	446	475	PF05658	1	28	ls	12.2	0.8	Hep_Hag	no
OTV5_080F	459	476	PF05670	1	18	fs	5.0	0.67	DUF814	yes
OTV5_080F	478	507	PF05658	1	28	ls	0.3	15	Hep_Hag	yes
OTV5_080F	526	555	PF05658	1	28	ls	0.5	14	Hep_Hag	no
OTV5_081F	1	337	PF04451	1	706	ls	50.1	9.6e-14	Capsid_Iridovir	no
OTV5_081F	251	270	PF05419	151	171	fs	4.5	0.68	GUN4	yes
OTV5_083F	27	44	PF07521	1	18	fs	6.2	0.71	RMMBL	no
OTV5_084F	2	93	PF00293	1	89	fs	10.9	0.0083	NUDIX	no
OTV5_086F	13	40	PF01650	249	286	fs	3.3	0.92	Peptidase_C13	no
OTV5_086F	27	40	PF06024	1	14	fs	5.8	0.23	DUF912	no
OTV5_086F	65	207	PF01896	1	239	ls	-10.3	0.52	DNA_primase_S	no
OTV5_086F	293	355	PF03121	1	94	ls	1.7	0.24	Herpes_UL52	no
OTV5_086F	374	388	PF00385	49	68	fs	7.8	0.16	Chromo	no
OTV5_086F	442	463	PF00097	31	50	fs	7.4	0.02	zf-C3HC4	no
OTV5_091R	177	196	PF00864	363	382	fs	5.0	0.33	P2X_receptor	no
OTV5_092F	88	154	PF01233	85	153	fs	58.4	2.6e-17	NMT	no
OTV5_092F	194	294	PF02799	1	258	ls	-148.7	0.42	NMT_C	no
OTV5_092F	204	224	PF02109	1	21	fs	4.6	0.22	DAD	yes
OTV5_093F	44	139	PF08242	1	109	ls	55.8	1.5e-13	Methyltransf_12	no
OTV5_094F	28	140	PF08325	1	252	ls	-82.2	0.25	WLM	no
OTV5_095F	1	39	PF09430	1	47	fs	5.3	0.49	DUF2012	no
OTV5_097F	12	302	PF02086	1	304	ls	60.6	5.4e-15	MethyltransfD12	no
OTV5_097F	17	30	PF04223	1	14	fs	2.5	0.86	CitF	yes
OTV5_097F	21	39	PF02187	1	22	fs	9.0	0.033	GAS2	yes
OTV5_098R	17	33	PF01926	1	17	fs	8.7	0.11	MMR_HSR1	no
OTV5_098R	17	37	PF03205	1	21	fs	5.2	0.48	MobB	no
OTV5_099F	1	381	PF04451	1	706	ls	119.3	1.2e-32	Capsid_Iridovir	no
OTV5_099F	339	350	PF08161	1	13	fs	3.8	0.81	NUC173	yes
OTV5_100F	5	426	PF04451	1	706	ls	54.6	6.1e-14	Capsid_Iridovir	no
OTV5_100F	88	101	PF07656	1	14	fs	7.4	0.84	KWG	yes
OTV5_100F	197	227	PF00564	1	33	fs	5.7	0.61	PB1	yes
OTV5_100F	321	345	PF08145	1	25	fs	1.4	0.83	BOP1NT	yes
OTV5_101F	35	57	PF00808	44	66	fs	5.6	0.75	CBFD_NFYB_HMF	no
OTV5_103F	19	48	PF04143	36	65	fs	7.1	0.26	DUF395	no
OTV5_104R	298	321	PF07698	1	24	fs	4.7	0.64	7TM-7TMR_HD	no
OTV5_114F	3	32	PF00637	1	29	fs	5.0	0.73	Clathrin	no
OTV5_115F	1	123	PF00705	1	127	ls	22.8	2e-08	PCNA_N	no
OTV5_115F	1	243	PF04005	1	326	ls	-119.0	0.056	Hus1	no
OTV5_115F	126	242	PF02747	1	128	ls	48.3	2.7e-11	PCNA_C	yes
OTV5_116R	18	39	PF05851	231	252	fs	4.8	0.4	Lentivirus_VIF	no
OTV5_117F	97	138	PF08271	1	44	ls	20.9	0.0013	TFIIB_Zn_Ribbon	no
OTV5_117F	98	130	PF09723	1	43	ls	-10.3	0.65	CxxC_CxxC_SSSS	yes
OTV5_117F	140	313	PF04947	1	190	ls	234.1	3.2e-67	Pox_VLTF3	no
OTV5_117F	168	186	PF06348	41	59	fs	5.9	0.77	DUF1059	yes
OTV5_117F	177	196	PF04239	107	126	fs	7.3	0.14	DUF421	yes
OTV5_117F	180	246	PF06817	1	71	ls	-4.8	0.46	RVT_thumb	yes
OTV5_118F	54	95	PF02891	1	54	ls	-15.8	0.15	zf-MIZ	no
OTV5_119R	44	60	PF07863	58	74	fs	6.6	0.25	CtnDOT_TraJ	no
OTV5_121F	55	82	PF01185	1	47	fs	5.4	0.33	Hydrophobin	no
OTV5_122R	6	27	PF01467	1	22	fs	20.5	1.7e-05	CTP_transf_2	no
OTV5_123F	9	148	PF00565	1	158	ls	30.4	2.1e-07	SNase	no
OTV5_126R	1	26	PF00528	243	268	fs	6.3	0.3	BPD_transp_1	no
OTV5_126R	2	19	PF01998	85	102	fs	8.2	0.16	DUF131	yes
OTV5_126R	92	150	PF03171	1	63	fs	34.6	3.8e-09	2OG-FeII_Oxy	no
OTV5_130R	8	49	PF08746	1	57	ls	-2.8	0.28	zf-RING-like	no
OTV5_130R	16	74	PF02176	1	61	ls	-5.6	0.27	zf-TRAF	no
OTV5_131F	98	186	PF00754	61	163	fs	60.5	1e-16	F5_F8_type_C	no
OTV5_131F	208	343	PF00754	1	163	fs	50.0	9.8e-14	F5_F8_type_C	no
OTV5_132R	62	74	PF01218	330	342	fs	3.1	0.27	Coprogen_oxidas	no
OTV5_133R	13	226	PF03194	1	412	ls	-147.2	0.85	LUC7	no
OTV5_133R	235	515	PF08619	1	651	ls	-187.9	0.76	Nha1_C	no
OTV5_133R	258	274	PF04707	147	164	fs	4.4	0.55	PRELI	yes
OTV5_134R	62	184	PF04558	1	175	ls	-66.9	0.19	tRNA_synt_1c_R1	no
OTV5_134R	80	253	PF06102	1	206	ls	-81.1	0.98	DUF947	no
OTV5_134R	145	162	PF07261	467	490	fs	3.2	0.91	DnaB_2	yes
OTV5_134R	150	161	PF02934	277	288	fs	3.3	0.68	GatB_N	yes
OTV5_134R	191	208	PF04918	158	175	fs	4.7	0.55	DltD_M	yes
OTV5_134R	210	238	PF09010	68	101	fs	7.3	0.24	AsiA	yes
OTV5_134R	415	710	PF05316	1	413	ls	-233.7	0.86	VAR1	no
OTV5_134R	707	717	PF03310	1	11	fs	3.7	0.92	Cauli_DNA-bind	no
OTV5_135R	6	30	PF03705	1	25	fs	7.4	0.18	CheR_N	no
OTV5_135R	28	45	PF05726	89	106	fs	8.1	0.17	Pirin_C	no
OTV5_135R	72	119	PF07498	1	43	ls	5.3	0.15	Rho_N	no
OTV5_135R	98	107	PF00216	1	10	fs	5.9	0.47	Bac_DNA_binding	yes
OTV5_135R	343	852	PF03999	1	730	ls	-277.3	0.91	MAP65_ASE1	no
OTV5_135R	550	659	PF04513	1	155	ls	-47.4	0.33	Baculo_PEP_C	yes
OTV5_135R	730	740	PF06840	1	12	fs	1.8	2.2	DUF1241	yes
OTV5_135R	734	763	PF00430	68	97	fs	0.5	15	ATP-synt_B	yes
OTV5_135R	886	896	PF06840	1	12	fs	1.8	2.2	DUF1241	no
OTV5_135R	890	919	PF00430	68	97	fs	4.4	1.3	ATP-synt_B	no
OTV5_135R	1016	1023	PF06408	480	487	fs	1.7	0.81	Homo_sperm_syn	no
OTV5_135R	1366	1394	PF04420	28	56	fs	3.6	0.96	CHD5	no
OTV5_135R	1430	1450	PF06537	446	466	fs	4.1	0.19	DUF1111	no
OTV5_136R	141	154	PF07882	1	14	fs	6.0	0.29	Fucose_iso_N2	no
OTV5_136R	144	312	PF01734	1	262	ls	71.2	3.5e-18	Patatin	no
OTV5_136R	157	180	PF06658	14	37	fs	4.8	0.43	DUF1168	yes
OTV5_136R	225	238	PF08793	24	37	fs	8.0	0.27	2C_adapt	yes
OTV5_136R	308	345	PF05094	1	40	fs	1.9	0.92	LEF-9	no
OTV5_137R	74	99	PF00033	1	28	fs	5.3	0.16	Cytochrom_B_N	no
OTV5_137R	81	106	PF02947	1	26	fs	3.9	0.26	Flt3_lig	no
OTV5_144F	1	23	PF05667	633	655	fs	4.0	0.34	DUF812	no
OTV5_144F	4	43	PF00435	46	87	fs	4.7	0.81	Spectrin	no
OTV5_144F	8	32	PF05597	111	135	fs	7.3	0.14	Phasin	yes
OTV5_144F	49	130	PF02201	1	80	ls	43.0	1e-09	SWIB	no
OTV5_145F	24	50	PF00855	59	86	fs	5.5	0.49	PWWP	no
OTV5_145F	43	133	PF00636	1	100	ls	143.3	6.9e-40	Ribonuclease_3	no
OTV5_145F	162	224	PF00035	1	67	ls	52.8	1.2e-12	dsrm	no
OTV5_146F	24	153	PF09588	1	159	ls	125.9	1.2e-34	YqaJ	no
OTV5_146F	200	207	PF08894	246	253	fs	3.3	0.71	DUF1838	no
OTV5_147R	1	18	PF06070	1	18	fs	4.2	0.13	Herpes_UL32	no
OTV5_147R	81	98	PF07334	1	19	fs	4.0	0.81	IFP_35_N	no
OTV5_147R	231	239	PF03119	21	30	fs	5.7	0.59	DNA_ligase_ZBD	no
OTV5_147R	257	289	PF08792	1	37	ls	7.7	1.3	A2L_zn_ribbon	no
OTV5_147R	311	343	PF08792	1	37	ls	3.8	3.7	A2L_zn_ribbon	no
OTV5_149F	1	13	PF06134	1	13	fs	2.1	0.85	RhaA	no
OTV5_149F	22	182	PF00176	1	204	fs	115.1	1.6e-31	SNF2_N	no
OTV5_149F	333	411	PF00271	1	76	fs	64.8	4.7e-18	Helicase_C	no
OTV5_149F	410	426	PF03020	27	44	fs	7.5	0.3	LEM	no
OTV5_151F	7	28	PF05069	24	45	fs	4.9	0.5	Phage_tail_S	no
OTV5_153R	1	90	PF03477	1	104	ls	37.7	4.1e-08	ATP-cone	no
OTV5_153R	95	123	PF03477	76	104	fs	1.7	9.6	ATP-cone	no
OTV5_153R	99	116	PF01964	1	21	fs	3.6	0.54	ThiC	yes
OTV5_153R	127	199	PF00317	1	102	ls	110.9	3.9e-30	Ribonuc_red_lgN	no
OTV5_153R	201	729	PF02867	1	601	ls	1015.8	1.6e-302	Ribonuc_red_lgC	no
OTV5_153R	592	601	PF09442	86	95	fs	5.0	0.51	DUF2018	yes
OTV5_154R	3	14	PF04431	1	12	fs	6.3	0.037	Pec_lyase_N	no
OTV5_155F	113	125	PF08925	308	320	fs	2.5	0.45	DUF1907	no
OTV5_156F	38	114	PF03819	1	80	ls	11.7	0.00017	MazG	no
OTV5_158R	118	155	PF00857	168	205	fs	3.6	0.88	Isochorismatase	no
OTV5_161F	105	200	PF00352	1	89	ls	4.6	0.00049	TBP	no
OTV5_162F	29	49	PF01690	1	24	fs	4.7	0.21	PLRV_ORF5	no
OTV5_162F	46	61	PF01167	1	18	fs	2.8	1	Tub	no
OTV5_162F	51	71	PF00754	142	163	fs	8.6	0.056	F5_F8_type_C	no
OTV5_162F	83	103	PF08191	1	21	fs	8.2	0.19	LRR_adjacent	no
OTV5_162F	85	155	PF00754	1	96	fs	39.9	7.2e-11	F5_F8_type_C	no
OTV5_164F	3	48	PF00628	1	53	ls	-15.8	0.93	PHD	no
OTV5_164F	4	45	PF00097	1	50	ls	27.2	6.1e-05	zf-C3HC4	yes
OTV5_164F	28	76	PF07567	1	60	ls	-7.3	0.32	zf-C2HC_plant	no
OTV5_165R	78	91	PF04191	186	199	fs	3.1	0.63	PEMT	no
OTV5_165R	124	161	PF01476	1	44	ls	0.6	0.57	LysM	no
OTV5_167R	1	25	PF07578	48	72	fs	5.9	0.4	LAB_N	no
OTV5_167R	5	23	PF09555	1	19	fs	5.7	0.67	Spore_III_AD	yes
OTV5_167R	32	84	PF00462	1	82	ls	-7.0	0.93	Glutaredoxin	no
OTV5_168R	54	282	PF00069	1	287	ls	-65.8	0.00011	Pkinase	no
OTV5_168R	307	333	PF02379	81	106	fs	4.9	0.52	PTS_IIB_fruc	no
OTV5_169R	20	34	PF00368	1	15	fs	1.4	0.33	HMG-CoA_red	no
OTV5_173R	1	47	PF03748	1	61	fs	8.8	0.048	FliL	no
OTV5_173R	1	43	PF01699	63	96	fs	9.5	0.066	Na_Ca_ex	no
OTV5_173R	1	81	PF04277	1	85	ls	-6.3	0.28	OAD_gamma	no
OTV5_174R	7	288	PF00268	1	296	ls	446.5	3.6e-131	Ribonuc_red_sm	no
OTV5_174R	95	120	PF05794	626	655	fs	3.4	0.43	Tcp11	yes
OTV5_175R	22	56	PF00462	1	42	fs	11.9	0.0087	Glutaredoxin	no
OTV5_176F	111	142	PF08243	22	58	fs	8.9	0.013	SPT2	no
OTV5_177F	25	64	PF08271	1	44	ls	6.4	0.066	TFIIB_Zn_Ribbon	no
OTV5_177F	140	201	PF00382	10	74	fs	35.0	7.2e-09	TFIIB	no
OTV5_177F	185	209	PF05269	28	54	fs	6.3	0.45	Phage_CII	no
OTV5_177F	186	201	PF09669	1	17	fs	3.2	0.81	Phage_pRha	yes
OTV5_178F	62	163	PF00535	78	149	fs	6.6	0.12	Glycos_transf_2	no
OTV5_180F	27	70	PF01331	1	49	fs	25.3	3e-11	mRNA_cap_enzyme	no
OTV5_180F	137	168	PF01331	182	213	fs	30.0	3e-13	mRNA_cap_enzyme	no
OTV5_180F	171	278	PF03919	1	138	ls	22.5	3.1e-06	mRNA_cap_C	no
OTV5_180F	250	266	PF03105	329	345	fs	3.3	0.69	SPX	yes
OTV5_181R	2	254	PF00443	1	334	ls	75.8	1.4e-19	UCH	no
OTV5_181R	221	236	PF01473	1	16	fs	7.8	0.21	CW_binding_1	yes
OTV5_183F	4	21	PF05889	407	424	fs	3.1	0.58	SLA_LP_auto_ag	no
OTV5_183F	5	45	PF06694	183	223	fs	2.9	0.7	Plant_NMP1	no
OTV5_183F	6	155	PF02940	1	273	ls	-39.9	0.004	mRNA_triPase	no
OTV5_183F	126	142	PF02982	144	160	fs	5.9	0.1	Scytalone_dh	yes
OTV5_183F	131	138	PF00833	1	8	fs	2.6	0.84	Ribosomal_S17e	yes
OTV5_187R	1	11	PF06763	189	199	fs	3.3	0.48	Minor_tail_Z	no
OTV5_187R	7	31	PF06009	120	144	fs	5.1	0.67	Laminin_II	no
OTV5_188R	14	44	PF04437	498	528	fs	3.3	0.77	RINT1_TIP1	no
OTV5_188R	190	352	PF08706	1	191	ls	-14.8	0.87	D5_N	no
OTV5_190F	11	428	PF04451	1	706	ls	417.2	2.4e-122	Capsid_Iridovir	no
OTV5_190F	64	87	PF02470	74	98	fs	4.9	0.9	MCE	yes
OTV5_190F	72	81	PF02384	1	10	fs	2.8	0.76	N6_Mtase	yes
OTV5_192F	1	138	PF00075	1	164	fs	150.8	1e-44	RnaseH	no
OTV5_193F	16	31	PF07363	76	91	fs	3.8	0.68	DUF1484	no
OTV5_197F	2	261	PF00365	1	312	ls	-58.3	2.7e-09	PFK	no
OTV5_197F	12	31	PF04086	1	22	fs	3.7	0.96	SRP-alpha_N	yes
OTV5_199F	51	248	PF01028	1	273	ls	-71.2	0.00032	Topoisom_I	no
OTV5_199F	93	99	PF07799	146	152	fs	2.3	0.52	DUF1643	yes
OTV5_199F	210	230	PF06150	19	39	fs	6.1	0.41	ChaB	yes
OTV5_201R	5	23	PF06030	348	366	fs	4.3	0.64	DUF916	no
OTV5_201R	27	205	PF01755	1	242	ls	-48.4	0.0067	Glyco_transf_25	no
OTV5_201R	76	86	PF08840	1	11	fs	4.0	0.96	BAAT_C	yes
OTV5_201R	201	223	PF05528	1	23	fs	4.0	0.44	Coronavirus_5	no
OTV5_202F	1	25	PF06899	1	25	fs	1.7	0.85	WzyE	no
OTV5_202F	11	61	PF04193	1	67	ls	17.3	0.00044	PQ-loop	no
OTV5_203F	5	180	PF05118	1	180	ls	14.1	3.3e-07	Asp_Arg_Hydrox	no
OTV5_203F	51	63	PF01809	55	68	fs	5.6	0.83	DUF37	yes
OTV5_204R	146	154	PF00362	1	9	fs	1.7	0.55	Integrin_beta	no
OTV5_205R	76	240	PF01068	1	220	fs	71.6	3.2e-21	DNA_ligase_A_M	no
OTV5_206F	18	39	PF03268	345	366	fs	3.6	0.62	DUF267	no
OTV5_208R	37	51	PF06335	1	15	fs	5.8	0.34	DUF1054	no
OTV5_210R	30	48	PF01695	45	63	fs	7.7	0.039	IstB	no
OTV5_210R	36	48	PF08477	1	13	fs	9.3	0.038	Miro	no
OTV5_215F	56	130	PF06005	1	88	ls	-13.1	0.32	DUF904	no
OTV5_216R	7	159	PF04848	1	163	ls	-0.1	7.6e-07	Pox_A22	no
OTV5_218F	2	143	PF00908	1	181	ls	-15.2	2.2e-10	dTDP_sugar_isom	no
OTV5_218F	61	80	PF02643	106	125	fs	6.0	0.44	DUF192	yes
OTV5_218F	132	146	PF03395	1	15	fs	1.7	0.57	Pox_P4A	no
OTV5_218F	145	251	PF01370	1	155	fs	19.5	0.00014	Epimerase	no
OTV5_220F	77	91	PF03956	180	194	fs	3.2	0.99	DUF340	no
OTV5_221F	10	251	PF01619	1	379	ls	-45.9	1.8e-05	Pro_dh	no
OTV5_222F	15	33	PF04602	1111	1126	fs	1.4	0.84	Arabinose_trans	no
OTV5_226F	60	201	PF05118	1	180	ls	3.9	2.2e-06	Asp_Arg_Hydrox	no
OTV5_227R	1	176	PF00265	1	188	ls	193.3	5.9e-55	TK	no
OTV5_227R	13	24	PF08750	154	165	fs	4.6	0.68	CNP1	yes
OTV5_228F	69	83	PF08599	6	21	fs	3.8	0.34	Nbs1_C	no
OTV5_231F	10	139	PF00692	1	137	ls	195.8	1.1e-55	dUTPase	no
OTV5_235F	4	90	PF05670	1	104	ls	48.6	2.2e-11	DUF814	no
OTV5_235F	114	125	PF03918	146	157	fs	4.4	0.86	CcmH	no
OTV5_237R	1	84	PF00581	1	128	ls	2.8	0.13	Rhodanese	no
OTV5_239R	1	362	PF04451	1	706	ls	101.4	2.9e-27	Capsid_Iridovir	no
OTV5_239R	15	26	PF08375	1	12	fs	7.2	0.53	Rpn3_C	yes
OTV5_240F	25	362	PF03104	1	441	ls	152.7	1e-42	DNA_pol_B_exo	no
OTV5_240F	31	190	PF02397	1	198	ls	-120.2	0.95	Bac_transf	yes
OTV5_240F	59	74	PF06275	65	80	fs	6.0	0.4	DUF1031	yes
OTV5_240F	436	892	PF00136	1	537	fs	436.5	5.9e-130	DNA_pol_B	no
OTV5_240F	619	633	PF00308	57	71	fs	3.0	0.79	Bac_DnaA	yes
OTV5_240F	864	884	PF04599	120	140	fs	2.9	0.15	Pox_G5	yes
OTV5_240F	902	936	PF02037	1	35	ls	13.2	0.054	SAP	no
OTV5_240F	919	941	PF04738	529	551	fs	3.5	0.69	Lant_dehyd_C	no
OTV5_243R	1	447	PF04451	1	706	ls	-86.5	7.8e-08	Capsid_Iridovir	no
OTV5_243R	112	120	PF01155	113	121	fs	1.8	0.89	HypA	yes
OTV5_244R	48	198	PF02518	1	127	ls	-1.0	0.11	HATPase_c	no
OTV5_244R	243	393	PF00204	1	187	ls	46.5	6.5e-11	DNA_gyraseB	no
OTV5_244R	583	591	PF03833	1	9	fs	-2.0	0.87	PolC_DP2	no
OTV5_244R	663	1070	PF00521	1	491	ls	106.8	6.6e-29	DNA_topoisoIV	no
OTV5_244R	780	794	PF00851	292	306	fs	0.9	0.51	Peptidase_C6	yes
OTV5_244R	856	893	PF09187	84	119	fs	3.6	0.86	DUF1950	yes
OTV5_244R	867	880	PF05570	16	29	fs	8.2	0.045	DUF765	yes
OTV5_244R	883	903	PF00395	11	31	fs	6.6	0.45	SLH	yes
OTV5_244R	931	941	PF08475	185	195	fs	4.2	0.15	Baculo_VP91_N	yes
OTV5_246F	131	166	PF07423	151	185	fs	2.6	0.52	DUF1510	no
OTV5_246F	192	239	PF06338	142	190	fs	4.2	0.71	ComK	no
OTV5_248F	84	98	PF04033	86	100	fs	5.7	0.38	DUF365	no
OTV5_249F	3	24	PF01925	271	292	fs	5.0	0.66	DUF81	no
OTV5_249F	9	22	PF05460	137	150	fs	3.4	0.9	ORC6_1	yes
OTV5_252R	111	232	PF00534	1	148	fs	25.8	1.3e-06	Glycos_transf_1	no
OTV5_252R	133	144	PF04663	1	13	fs	5.5	0.61	Phenol_monoox	yes
OTV5_254R	131	147	PF01331	1	18	fs	2.3	0.14	mRNA_cap_enzyme	no
OTV5_254R	177	196	PF09384	135	154	fs	5.0	0.72	U3_snoRNA_C	no
OTV5_256F	67	74	PF05529	225	232	fs	5.1	0.44	Bap31	no
OTV5_262F	8	22	PF08214	1	15	fs	3.5	0.62	RTT109	no
