# Supplementary material for: Life-Cycle and Genome of OtV5, a Large DNA Virus of the Pelagic Marine Unicellular Green Alga Ostreococcus tauri
Source: PLoS One. 2008 May 28;3(5):e2250. doi: 10.1371/journal.pone.0002250 (PMC2386258; doi:10.1371/journal.pone.0002250)
Supplement: Table S2 — Comparison of OtV5 with other algal viruses. OtV5: O. tauri virus strain 5; PBCV-1: P. bursaria chlorella virus strain 1; P. bursaria chlorella virus strain NY-2A; MT325: P. bursaria chlorella virus strain MT325; EhV-86: E. huxleyi virus strain 86. For each gene, numbers correspond to the number of copies of this gene family in the genome. Highlighting colors: yellow-common to characterized micro-algal large DNA viruses, orange-common to characterized phycodnaviruses of Chlorophyta, green-not present in other characterized phycodnaviruses. (0.03 MB XLS) [file pone.0002250.s002.xls]

## Sheet: Feuil1
Gene names	OtV5	PBCV-1	NY-2A	AR 158	MT 325	FR 483	ATCV-1	EhV-86
DNA, replication, recombination and repair
Delta-DNA polymerase	1	1	1	1	1	1	1	1
Archaeo-eukaryotic primase	0	1	1	1	1	1	1	0
PCNA	1	2	2	2	2	2	2	2
Replication factor C	0	1	1	1	1	1	1	0
Rnase H	1	1	1	1	1	1	1	0
Helicase	1	1	1	1	1	1	1	1
DNA topoisomerase	2	1	1	1	1	1	1	2
ATPase (PP-loop)	0	1	1	1	1	1	1	0
ATPase (DNA packaging)	1	1	1	1	1	1	1	0
Pyrimidine dinner-specific glycosylase	0	1	1	1	1	1	1	0
ATP dependant DNA ligase	1	1	1	1	0	0	1	1
DNA binding protein	0	0	0	0	0	0	0	4
Exonuclease	2	1	1	1	1	1	1	0
Transcription
DNA-dependant RNApolymerase II	0	0	0	0	0	0	0	6
Transcription factor IIB	1	1	1	1	1	1	1	0
Transcription factor IID	0	1	1	1	1	1	1	0
Transcription factor IIS	1	1	1	1	1	1	1	1
Transcription activator	1	1	1	1	1	1	1	0
Tata-box Binding Protein (TBP)	1	0	0	0	0	0	0	0
Superfamily II helicase	0	3	3	3	3	3	1	1
mRNA guanylyltransferase	0	1	1	1	1	1	1	0
RNA triphosphatase	0	1	1	1	1	1	1	2
Histone H3, Lys27 methylase	0	1	2	2	1	1	1	0
SWI/SNF chromatin remodeling comple1	0	1	1	1	1	1	1	0
SWI/SNF helicase	0	1	1	1	1	1	1	0
RNase III	1	1	1	1	1	1	1	1
Cytosine deaminase	0	1	1	1	1	1	1	0
Sugar manipulation enzymes
GDP-D-mannose dehydratase	1	1	1	1	0	0	1	0
6-Phospho fructokinase	1	0	0	0	0	0	0	0
Acetolactate synthase (2-2-1-6)	1	0	0	0	0	0	0	0
UDP-glucose 6-deshydrogenase	0	1	1	2	1	1	1	0
Mannose-6P- isomerase	0	0	0	0	0	0	1	0
Glucosamine synthase	0	1	1	1	1	1	0	0
Hyaluronan synthase	0	1	0	0	1	1	0	0
dTDP-D-glucose 4,6-dehydratase	2	0	0	0	0	0	1	0
Chitin synthase	0	0	2	3	0	0	0	0
Cellulase precursor	0	0	0	1	1	1	1	0
Sialidase	0	0	0	0	0	0	0	1
dTDP-glucose pyrophosphorylase	0	0	0	0	1	1	0	0
Polysaccaride deacetylase	0	0	1	1	0	0	0	0
DNA methylation and site-specific endonucleases
Adenine DNA methyltransferase	3	2	11	9	0	1	0	0
Cytosine DNA methyltransferase	0	3	7	7	1	2	1	0
Methyltransferase FkbM	1	0	1	1	1	1	0	0
DNA restriction endonuclease	0	2	2	2	0	0	0	0
Cell wall degradation
Chitinase	0	2	1	1	2	1	2	0
Chitosanase	0	1	1	1	1	1	1	0
Beta, alpha 1,4- glucuronic lyase	0	1	2	2	1	1	1	0
Beta-1,3-glucanase	0	1	1	1	1	1	1	0
a-L-arabino furanosidase	0	0	0	0	0	0	1	0
Nucleotide metabolism
Ribonucleotide reductase Lsubunit	1	1	1	1	1	1	1	1
Ribonucleotide reductase Ssubunit	1	1	1	1	1	1	1	1
Thymidine K/thymidylate S	1	1	1	1	1	1	1	1
dUTP pyrophosphatase	1	1	1	1	1	1	1	0
Aspartate transcarbamylase	0	1	1	1	0	0	0	0
Deoxynucleoside kinase	0	1	0	0	1	1	1	0
Glutaredoxin	0	1	1	1	2	2	2	0
Thioredoxin	0	1	1	1	3	3	2	2
Ribonucleotide-triphosphate reductase	0	0	0	0	0	0	1	1
dCMP deaminase	0	1	1	1	1	1	1	1
Protein synthesis and degradation
N-myristoyl transferase	1	0	0	0	0	0	0	0
Serine palmitoyltransferase	0	0	0	0	0	0	0	1
Prolyl 4-hydroxylase	1	1	1	1	1	1	1	0
33 kDa in vitro translation peptide	2	0	0	0	0	0	0	0
Translation elongation factor-3	0	2	0	1	2	1	1	0
Thiol oxydoreductase	0	1	1	1	1	1	1	0
Protein disulfide isomerase	0	1	1	1	1	1	1	0
SKP-1 protein	0	1	1	1	1	1	1	0
Ubiquitin	0	0	1	0	0	0	1	0
Ring finger ubiquitin ligase	0	1	1	1	1	1	1	2
Aminotransferase family protein	1	0	0	0	0	0	0	0
3-Dehydroquinate synthase	1	0	0	0	0	0	0	0
Asparagine synthase	1	0	0	0	0	0	0	0
NAD-dependant epimerase dehydratase	1	0	0	0	0	0	0	0
Aspartyl/Asparaginyl beta-hydrolase	1	0	0	0	0	0	0	0
Ubiquitin hydrolase-like cystein peptidase	0	1	1	1	1	1	1	1
FtsH (3-4-24) metalloendopeptidase	1	0	0	0	0	0	0	0
Zinc metallo protease	1	2	2	2	1	1	1	5
Initiation factor 2	0	0	0	0	0	1	1	0
ATP-dependant protease proteolytic subunit	0	0	0	0	0	0	0	1
Lipid – Fatty acid metabolism
Oxoacyl (acyl-carrier protein) dehydrogenase	1	0	0	0	0	0	0	0
Lipopolysaccharide biosynthesis protein rf6H	1	0	0	0	0	0	0	0
Acetyltransferase	0	1	0	0	0	0	0	0
N-acetyltransferase	0	1	1	1	1	1	1	0
Lipoprotein lipase	0	1	1	1	1	1	1	1
Glycerophosphoryl diesterase	0	1	1	1	0	0	1	0
Lysophospho-lipase	0	1	1	1	0	0	1	0
Sterol desaturase	0	0	0	0	0	0	0	1
Fatty acid desaturase	0	0	0	0	0	0	0	2
Esterase	0	0	0	0	0	0	0	1
Lipid Phosphate phosphatase	0	0	0	0	0	0	0	1
Transmembrane fatty acid elongation protein	0	0	0	0	0	0	0	1
Alkyl sulfatase	0	0	0	0	0	1	0	0
Patatin-like phospholipase	1	1	1	1	1	1	1	0
Signaling
Potassium channel protein	1	1	1	1	1	0	1	1
Ligand-gated channel protein	0	1	0	0	0	1	1	0
Glutamate receptor	0	1	0	0	0	0	0	0
Ca2+ transporting ATPase	0	0	0	1	1	0	0	0
Aquaglyceroporin	0	0	0	0	1	0	1	0
Rhodanese-like domain protein	1	1	1	1	1	1	1	1?
Serine/Threonine protein kinase	1	8	6	7	6	6	5	2
Miscellaneous
Ornithine:Arginine decarboxylase	0	1	1	1	1	1	1	0
Agmatine iminohydrolase	0	1	1	1	1	0	1	0
N-carbamoyl amidohydrolase	0	1	1	1	1	1	1	0
Homospermidine synthase	0	1	1	1	1	1	1	0
Histidine decarbo1ylase	0	1	1	1	1	1	1	0
Monoamine o1idase	0	1	1	1	1	1	1	0
Amidase	0	1	1	1	1	1	1	0
CuZn-supero1yde dismutase	0	1	0	0	1	1	1	0
O-methyl transferase	0	1	0	0	0	0	0	0
ABC transporter protein	0	1	1	1	1	1	1	0
ATPase (AAA+ class)	0	1	1	1	0	0	0	0
Erithrocyte binding protein	0	0	0	0	0	0	1	0
Mucin-desulfating sulfatase	0	0	0	0	0	0	1	0
Fibronectin binding protein	0	1	0	0	1	1	1	0
ATP/GTP binding site motif A AGB-1	1	0	0	0	0	0	0	0
Viral A-type inclusion protein	1	0	0	0	0	0	0	0
3-Dehydroquinate synthase	1	0	0	0	0	0	0	0
Flavin-dependant thymidylate synthase	1	0	0	0	0	0	0	0
Lectin protein	0	0	0	0	0	0	0	2
MRNA capping enzyme	0	0	0	0	0	0	0	1
Deoxyuridine 5-triphosphate nucleotidohydrolase	0	0	0	0	0	0	0	1
DnaJ domain-containing protein	0	0	0	0	0	0	0	1
Major facilitator superfamily protein	0	0	0	0	0	0	0	1
ERV1/ALR family protein	0	0	0	0	0	0	0	1
Dihydrofolate R–thymidylate S	0	0	0	0	0	0	0	1
Vesicle-associated membrane protein	0	0	0	0	0	0	0	1
Hydrolase	0	0	0	0	0	0	0	1
Phosphoglycerate mutase family	0	0	0	0	0	0	0	1
Longevity-assurance (LAG1) family protein	0	0	0	0	0	0	0	1
tRNA
Lys-tRNA	0	3	1	0	1	1	1	0
Leu-tRNA	0	2	2	2	1	1	1	1
Arg-tRNA	0	1	1	1	1	1	1	1
Val-tRNA	0	1	1	1	0	0	2	0
Ile-tRNA	1	1	0	1	1	1	0	1
Gln-tRNA	1	0	0	0	1	1	0	1
Tyr-tRNA	1	1	1	0	1	1	1	0
Asn-tRNA	1	2	1	1	2	2	2	1
Thr-tRNA	1	0	0	0	1	1	0	0
Gly-tRNA	0	0	0	0	1	1	1	0
Phe-tRNA	0	0	0	0	1	1	0	0
Ser-tRNA	0	0	0	0	0	0	1	0
Asp-tRNA	0	0	0	0	0	0	1	0
Integration and Transposition
Transposase	0	1	6	4	0	0	0	0
Resolvase	0	0	2	1	0	0	0	0
Tlr 6Fp DNA mobile protein	0	1	1	1	1	1	1	0
GIY-YIG endonuclease	0	7	16	13	10	9	10	3
HNH endonuclease	0	6	18	4	4	6	7	1
